# Supplementary material for: Selective dissociation and conversion of hemicellulose in Phyllostachys heterocycla cv. var. pubescens to value-added monomers via solvent-thermal methods promoted by AlCl3
Source: Royal Society of Chemistry journal article supplement (doi:10.1039/c4ra02209b), 2014-01-01
Supplement: c4ra02209b1.pdf [file c4ra02209b1.pdf]

Cite this: DOI: 10.1039/c0xx00000x

www.rsc.org/xxxxxx

ARTICLE TYPE

## Supplementary Information for

# Selective Dissociation and Conversion of Hemicellulose in *Phyllostachys Heterocycla* cv. var. *Pubescens* to Value-added Monomers via Solvent-thermal Methods Promoted by AlCl<sub>3</sub>

5 Yiping Luo<sup>a</sup>, Libin Hu<sup>a</sup>, Dongmei Tong<sup>a\*</sup>, Changwei Hu<sup>a\*</sup>

<sup>a</sup> Key Laboratory of Green Chemistry and Technology, Ministry of Education, College of Chemistry, Sichuan University, 29 Wangjiang Road, Chengdu, Sichuan, 610064, China.

## 10 Contents

### 1. The influence of reaction temperature and AlCl<sub>3</sub> on the selectivity to total monomers

- The influence of reaction temperature on the selectivity to total monomers for 0.5 h in the absence of AlCl<sub>3</sub> (Table S1).
- The influence of reaction temperature on the selectivity to total monomers for 0.5 h in the presence of AlCl<sub>3</sub> (Table S2).

### 15 2. The influence of reaction time and AlCl<sub>3</sub> on the selectivity to total monomers

- The influence of reaction time on the selectivity to total monomers at 140 °C in the absence of AlCl<sub>3</sub> (Table S3).
- The influence of reaction time on the selectivity to total monomers at 120 °C in the presence of AlCl<sub>3</sub> (Table S4).

### 20 3. The influence of reaction temperature on the distribution of liquid products carried out for 0.5 h without AlCl<sub>3</sub> and with AlCl<sub>3</sub> (Fig.S1).

### 4. The influence of reaction time on the product distribution in the hydrothermal conversion of *pubescens* (Fig.S2).

### 25 5. The influence of solvent, SiO<sub>2</sub> catalyst and temperature on the product distribution for 1 h (Table S5).

### 6. The effect of volume ratio of FL to THF and reaction time on the products distribution in the presence of SiO<sub>2</sub> at 160 °C (Table S6).

### 30 7. Analysis of liquid products

### 8. The mechanism for the AlCl<sub>3</sub> catalyzed conversion of C6 oligomers and C5 oligomers in hemicellulose to glucose and xylose in water.

- The mechanism for the AlCl<sub>3</sub> catalyzed conversion of C6 oligomers in hemicellulose to glucose in water (Fig. S3).
- The mechanism for the AlCl<sub>3</sub> catalyzed conversion of C5 oligomers in hemicellulose to xylose in water (Fig. S4).

### 35 9. The catalytic effect of the Al<sup>3+</sup>-species

- The effect of different catalysts on the conversion of *pubescens* and the three components in *pubescens* (Table S7).
- The GPC result of liquid fractions with different catalysts (Table S8).
- The influence of different catalyst on the product distribution (Table S9).

### 10. References (S1-S5)

---

## 1. The influence of reaction temperature and AlCl<sub>3</sub> on the selectivity to total monomers

Table S1 The influence of reaction temperature on the selectivity to total monomers for 0.5 h hydrothermal reaction in the absence of AlCl<sub>3</sub>

| Temperature (°C)                              | 140 | 160 | 180  | 200  | 220  | 240  |
|-----------------------------------------------|-----|-----|------|------|------|------|
| Selectivity to total monomers /% <sup>a</sup> | 9.8 | 6.1 | 14.9 | 28.2 | 29.7 | 22.8 |

5 <sup>a</sup> The selectivity to total monomers was defined as the summation of the selectivity to all the monomers obtained based on the converted *pubescens* feedstock

Table S2 The influence of reaction temperature on the selectivity to total monomers for 0.5 h hydrothermal reaction in the presence of AlCl<sub>3</sub>

| Temperature (°C)                              | 120 | 140  | 160  | 180  | 200  | 220  | 240  |
|-----------------------------------------------|-----|------|------|------|------|------|------|
| Selectivity to total monomers /% <sup>a</sup> | 8.8 | 27.9 | 19.2 | 27.9 | 26.5 | 25.1 | 27.5 |

10 <sup>a</sup> The selectivity to total monomers was defined as the summation of the selectivity to all the monomers obtained based on the converted *pubescens* feedstock

## 15 2. The influence of reaction time and AlCl<sub>3</sub> on the selectivity to total monomers

Table S3 The influence of reaction time on the selectivity to total monomers at 140 °C in the absence of AlCl<sub>3</sub>

| Time (h)                                      | 0.5  | 1.0  | 2.0 | 4.0 | 6.0 |
|-----------------------------------------------|------|------|-----|-----|-----|
| Selectivity to total monomers /% <sup>a</sup> | 10.0 | 15.4 | 8.0 | 9.3 | 9.2 |

20 <sup>a</sup> The selectivity to total monomers was defined as the summation of the selectivity to all the monomers obtained based on the converted *pubescens* feedstock.

Table S4 The influence of reaction time on the selectivity to total monomers at 120 °C in the presence of AlCl<sub>3</sub>

| Time (h)                                      | 0.5 | 1.0  | 2.0  | 4.0  | 6.0  | 8.0  |
|-----------------------------------------------|-----|------|------|------|------|------|
| Selectivity to total monomers /% <sup>a</sup> | 8.2 | 15.9 | 26.4 | 36.1 | 33.0 | 30.8 |

25 <sup>a</sup> The selectivity to total monomers was defined as the summation of the selectivity to all the monomers obtained based on the converted *pubescens* feedstock

5 3. The influence of reaction temperature on the distribution of liquid products carried out for 0.5 h without AlCl<sub>3</sub> and with AlCl<sub>3</sub>

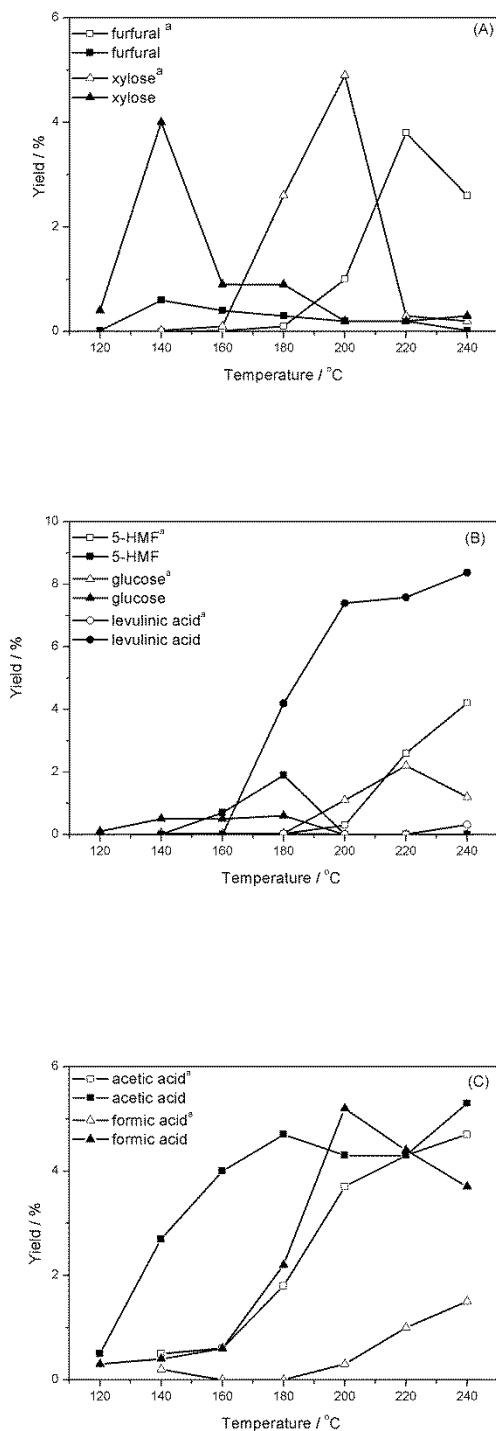

10

15 **Fig. S1** The influence of reaction temperature on the distribution of liquid products carried out for 0.5 h without AlCl<sub>3</sub><sup>a</sup> and with AlCl<sub>3</sub> (The yield of liquid product was defined as the weight percentage of product based on *pubescens* feedstock) .

#### 4. The influence of reaction time on the product distribution in the hydrothermal conversion of *pubescens*

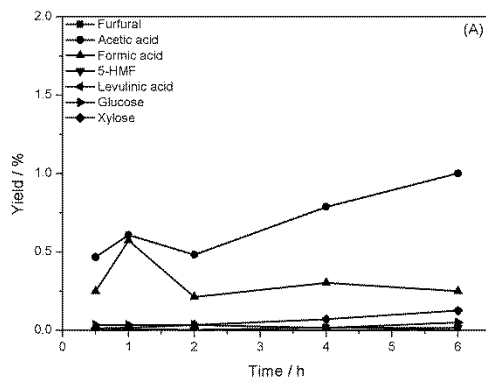

5

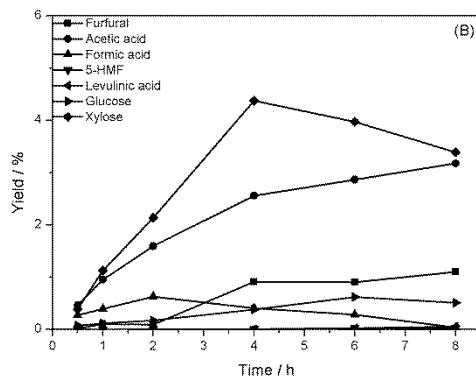

10 Fig. S2 The influence of reaction time on the product distribution in the hydrothermal conversion of *pubescens*: (A) at 140 °C without AlCl<sub>3</sub>; (B) at 120 °C with AlCl<sub>3</sub> (The yield of liquid product was defined as the weight percentage of product based on *pubescens* feedstock)

15

20

25

## 5. The influence of solvent, SiO<sub>2</sub> catalyst and temperature on the product distribution

**Table S5** The influence of solvent, SiO<sub>2</sub> catalyst and temperature on the product distribution for 1 h

| Items                                 |        | Yield <sup>f</sup> / % |      |      |       |      |      |      | Y <sub>total</sub> <sup>g</sup> / % |
|---------------------------------------|--------|------------------------|------|------|-------|------|------|------|-------------------------------------|
|                                       |        | Fur                    | AA   | FA   | 5-HMF | LA   | Glu  | Xyl  |                                     |
| FL <sup>a</sup>                       |        | 0.91                   | 2.56 | 0.41 | -     | -    | 0.38 | 4.37 | 8.63                                |
| FL <sup>b</sup>                       | 160 °C | 1.05                   | 3.23 | 0.67 | 0.05  | 0.14 | -    | -    | 5.14                                |
| FL/THF <sup>c</sup>                   | 160 °C | 1.98                   | 0.86 | 0.45 | 0.02  | 0.12 | 0.02 | 0.02 | 3.47                                |
|                                       | 180 °C | 2.41                   | 1.36 | 1.00 | 0.05  | 0.55 | 0.02 | 0.10 | 5.49                                |
|                                       | 200 °C | 2.19                   | 1.10 | 0.55 | 0.05  | 0.48 | -    | 0.10 | 4.47                                |
| SiO <sub>2</sub> -FL <sup>d</sup>     | 160 °C | 3.10                   | 3.08 | 0.50 | -     | 0.31 | 1.72 | 0.12 | 8.83                                |
|                                       | 180 °C | 2.12                   | 3.08 | 0.60 | -     | 0.41 | 2.41 | -    | 8.62                                |
|                                       | 200 °C | 0.96                   | 2.87 | 0.60 | -     | 0.41 | 3.08 | 0.12 | 8.04                                |
| SiO <sub>2</sub> -FL/THF <sup>e</sup> | 160 °C | 3.30                   | 2.25 | 2.06 | 0.02  | 1.46 | 1.43 | 0.14 | 10.66                               |
|                                       | 180 °C | 2.92                   | 2.03 | 2.15 | 0.02  | 1.89 | 1.84 | 0.02 | 10.87                               |
|                                       | 200 °C | 2.80                   | 1.89 | 2.22 | 0.02  | 1.84 | 1.88 | 0.07 | 10.72                               |

<sup>a</sup> FL= the filtrated liquid obtained at 120 °C for 4 h. <sup>b</sup> The 100 mL FL obtained at 120 °C for 4 h was directly heated to 160 °C for 1 h. <sup>c</sup> The further reaction was carried out with FL (50 mL) and THF (50 mL). <sup>d</sup> The further reaction was carried out with SiO<sub>2</sub> (1.00 g) and FL (100 mL). <sup>e</sup> The further reaction was carried out with SiO<sub>2</sub> (1.00 g), FL (50 mL) and THF (50 mL). <sup>f</sup> The yield of liquid product was defined as the weight percentage of product based on *pubescens* feedstock. <sup>g</sup> The total yield was the summation of liquid products obtained. Fur, AA, FA, 5-HMF, LA, Glu and Xyl were the abbreviation of furfural, acetic acid, formic acid, 5-hydroxymethyl furfural, levulinic acid, glucose and xylose.

10

## 6. The effect of volume ratio of FL to THF and reaction time on the products distribution

**Table S6** The effect of volume ratio of FL to THF and reaction time on the products distribution in the presence of SiO<sub>2</sub> at 160 °C

| Volume ratio | Time (h) | Yield <sup>a</sup> / % |      |      |       |      |      |      | Y <sub>total</sub> <sup>b</sup> / % |
|--------------|----------|------------------------|------|------|-------|------|------|------|-------------------------------------|
|              |          | Fur                    | AA   | FA   | 5-HMF | LA   | Glu  | Xyl  |                                     |
| 1:0          | 1        | 3.11                   | 3.08 | 0.50 | -     | 0.31 | 1.72 | 0.12 | 8.84                                |
| 1:1          | 1        | 3.30                   | 2.25 | 2.06 | 0.02  | 1.46 | 1.43 | 0.14 | 10.66                               |
| 1:3          | 1        | 5.09                   | 2.15 | 6.57 | 0.12  | 4.30 | 1.03 | 0.81 | 20.07                               |
|              | 2        | 5.93                   | 2.25 | 6.52 | 0.05  | 4.04 | 0.93 | 0.14 | 19.86                               |
|              | 4        | 5.76                   | 2.08 | 6.17 | 0.02  | 3.97 | 0.93 | -    | 18.93                               |
| 1:4          | 1        | 4.73                   | 2.44 | 6.88 | 0.02  | 5.62 | 1.17 | 1.17 | 22.03                               |
|              | 2        | 5.50                   | 2.08 | 8.56 | 0.10  | 5.52 | 0.91 | 0.65 | 23.32                               |
|              | 4        | 5.09                   | 2.27 | 8.10 | 0.45  | 6.29 | 0.96 | 0.07 | 23.23                               |
| 1:5          | 1        | 4.49                   | 2.10 | 7.24 | 0.17  | 4.85 | 1.03 | 2.39 | 22.27                               |

<sup>a</sup> The yield of liquid product was defined as the weight percentage of product based on *pubescens* feedstock. <sup>b</sup> The total yield was the summation of liquid products obtained.

## 7. Analysis of liquid products

The isomerization products such as fructose and xylulose in the presence of AlCl<sub>3</sub> catalyst were observed. However, the amount of fructose and xylulose was small in the present work. Y. Yang<sup>S1-S2</sup> showed that the isomerization of glucose to fructose was about 4 times slower than the dehydration of fructose to HMF. V. Choudhary<sup>S3</sup> showed that the presence of Lewis acid promoted the formation of xylulose, leading to a faster, more selective transformation. In our reaction system, once fructose and xylulose were formed, they quickly participated in the further hydrolysis reaction, thus they were not stably existed. Therefore, the amount of fructose and xylulose was so small that it was not discussed detailedly in manuscript. The formation of lactic acid was also observed. But the yield of lactic acid was low especially with the addition of SiO<sub>2</sub> and THF. So we did not discuss detailedly in manuscript.

8. The mechanism for the  $\text{AlCl}_3$  catalyzed conversion of C6 oligomers and C5 oligomers in hemicellulose to glucose and xylose in water<sup>S4-S5</sup>

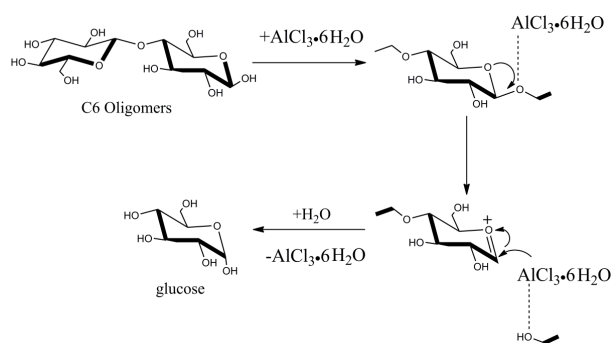

5

Fig. S3 The mechanism for the  $\text{AlCl}_3$  catalyzed conversion of C6 oligomers in hemicellulose to glucose in water.

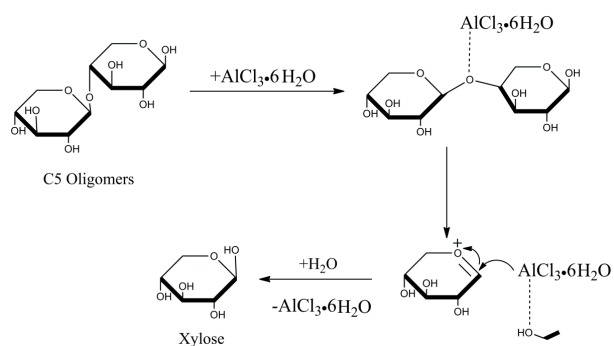

10

Fig. S4 The mechanism for the  $\text{AlCl}_3$  catalyzed conversion of C5 oligomers in hemicellulose to xylose in water

15

20

25

30

35

40

## 9. The catalytic effect of the Al<sup>3+</sup>-species

**Table S7** The effect of different catalysts on the conversion of *pubescens* and the three components in *pubescens*

| Samples                                           | Conversion / wt. % |               |           |        | S <sub>H</sub> <sup>d</sup> / wt. % |
|---------------------------------------------------|--------------------|---------------|-----------|--------|-------------------------------------|
|                                                   | <i>Pubescens</i>   | Hemicellulose | Cellulose | Lignin |                                     |
| HCl- <i>Pubescens</i> <sup>a</sup>                | 8.8                | 0.8           | 1.2       | 11.4   | 4.0                                 |
| HCl- <i>Pubescens</i> <sup>b</sup>                | 38.2               | 98.2          | 18.4      | 28.8   | 52.6                                |
| AlCl <sub>3</sub> - <i>Pubescens</i> <sup>c</sup> | 23.9               | 72.6          | 10.4      | 13.3   | 61.3                                |

<sup>5</sup> <sup>a</sup> Condition: 5 g *pubescens*, HCl=4.47×10<sup>-2</sup> mmol (the pH of solution was 3.35, which was identical to the pH value of 100 mL aqueous solution with the addition of 1 g AlCl<sub>3</sub>), 100 mL H<sub>2</sub>O at 120 °C for 4 h. <sup>b</sup> Condition: 5 g *pubescens*, HCl=22.5 mmol (This amount was identical to that could be formed via the complete hydrolysis of 1 g AlCl<sub>3</sub> in 100 mL aqueous solution), 100 mL H<sub>2</sub>O at 120 °C for 4 h. <sup>c</sup> Condition: 5 g *pubescens*, 1 g AlCl<sub>3</sub>, 100 mL H<sub>2</sub>O at 120 °C for 4 h. <sup>d</sup> The selectivity to hemicellulose.

**10 Table S8** The GPC result of liquid fractions with different catalysts

| Samples                                           | M <sub>w</sub> ( g/ mol) | Mn( g/ mol) | Polydispersity |
|---------------------------------------------------|--------------------------|-------------|----------------|
| HCl- <i>Pubescens</i> <sup>a</sup>                | 1120                     | 1110        | 1.01           |
| SiO <sub>2</sub> -FL/THF <sup>b</sup>             | 360                      | 313         | 1.15           |
| HCl- <i>Pubescens</i> <sup>c</sup>                | 1160                     | 1130        | 1.03           |
| SiO <sub>2</sub> -FL/THF <sup>d</sup>             | 456                      | 421         | 1.08           |
| AlCl <sub>3</sub> - <i>Pubescens</i> <sup>e</sup> | 578                      | 419         | 1.38           |

<sup>a</sup> The FL obtained at 120 °C for 4 h with 4.47×10<sup>-2</sup> mmol HCl ( the pH of solution was 3.35, which was identical to the pH value of 100 mL aqueous solution with the addition of 1 g AlCl<sub>3</sub>). <sup>b</sup> The FL obtained by the further reaction of liquid fraction from *a* in HCl-SiO<sub>2</sub>-FL/THF system at 160 °C for 4 h. <sup>c</sup> The FL obtained at 120 °C for 4 h with 22.5 mmol HCl (This amount was identical to that could be formed via the complete hydrolysis of 1 g AlCl<sub>3</sub> in 100 mL aqueous solution). <sup>d</sup> The FL obtained by the further reaction of liquid fraction from *c* in HCl-SiO<sub>2</sub>-FL/THF system at 160 °C for 4 h. <sup>e</sup> The FL obtained at 120 °C for 4 h with 1 g AlCl<sub>3</sub>.

**Table S9** The influence of different catalyst on the product distribution

| Items                                                    | Selectivity % <sup>g</sup> / % |      |      |       |      |     |      | S <sub>Total</sub> % <sup>h</sup> |
|----------------------------------------------------------|--------------------------------|------|------|-------|------|-----|------|-----------------------------------|
|                                                          | Fur                            | AA   | FA   | 5-HMF | LA   | Glu | Xyl  |                                   |
| HCl- <i>Pubescens</i> <sup>a</sup>                       | -                              | 6.2  | 0.8  | -     | -    | 0.1 | 0.1  | 7.2                               |
| HCl-SiO <sub>2</sub> -FL/THF <sup>b</sup>                | -                              | -    | 53.7 | 0.8   | -    | -   | -    | 54.5                              |
| HCl- <i>Pubescens</i> <sup>c</sup>                       | 3.3                            | 5.4  | -    | 0.1   | -    | 3.9 | 20.3 | 33.0                              |
| HCl-SiO <sub>2</sub> -FL/THF <sup>d</sup>                | 3.5                            | 2.0  | 10.3 | -     | -    | -   | -    | 15.8                              |
| AlCl <sub>3</sub> - <i>Pubescens</i> <sup>e</sup>        | 3.8                            | 10.7 | 1.7  | -     | -    | 1.6 | 18.3 | 36.1                              |
| AlCl <sub>3</sub> -SiO <sub>2</sub> -FL/THF <sup>f</sup> | 21.3                           | 9.5  | 33.9 | 1.9   | 26.3 | 4.0 | 0.3  | 97.3                              |

<sup>a</sup> Condition: 5 g *pubescens*, HCl=4.47×10<sup>-2</sup> mmol ( the pH of solution was 3.35, which was identical to the pH value of 100 mL aqueous solution with the addition of 1 g AlCl<sub>3</sub>), 100 mL H<sub>2</sub>O at 120 °C for 4 h. <sup>b</sup> Condition: 20 mL FL obtained from *a*, 80 mL THF, 1 g SiO<sub>2</sub> at 160 °C for 4 h. <sup>c</sup> Condition: 5 g *pubescens*, HCl=22.5 mmol (This amount was identical to that could be formed via the complete hydrolysis of 1 g AlCl<sub>3</sub> in 100 mL aqueous solution), 100 mL H<sub>2</sub>O at 120 °C for 4 h. <sup>d</sup> Condition: 20 mL FL obtained from *c*, 80 mL THF, 1 g SiO<sub>2</sub> at 160 °C for 4 h. <sup>e</sup> Condition: 5 g *pubescens*, 1 g AlCl<sub>3</sub>, 100 mL H<sub>2</sub>O at 120 °C for 4 h. <sup>f</sup> Condition: 20 mL FL obtained from *e*, 80 mL THF, 1 g SiO<sub>2</sub> at 160 °C for 4 h. <sup>g</sup> The selectivity of liquid product was defined as the weight percentage of product based on the converted *pubescens* feedstock. <sup>h</sup> The selectivity to total monomers was defined as the summation of the selectivity of all the monomers obtained based on the converted *pubescens* feedstock. Fur, AA, FA, 5-HMF, LA, Glu and Xyl were the abbreviation of furfural, acetic acid, formic acid, 5-hydroxymethyl furfural, levulinic acid, glucose and xylose.

The effect of HCl and AlCl<sub>3</sub> catalysts on the conversion of *pubescens* and the three components in *pubescens* was shown in Table S7. Compared with the result of AlCl<sub>3</sub>-catalyzed ones, the conversion of *pubescens* and the three components (hemicellulose, cellulose and lignin) was low when 4.47×10<sup>-2</sup> mmol HCl (the pH of solution was 3.35, which was identical to the pH value of 100 mL aqueous solution with the addition of 1 g AlCl<sub>3</sub>) was used in 100 mL H<sub>2</sub>O. When 22.5 mmol HCl (This amount was identical to that could be formed via the complete hydrolysis of 1 g AlCl<sub>3</sub> in 100 mL aqueous solution) was used in 100 mL H<sub>2</sub>O, the conversion of *pubescens* was 38.2 wt% and 98.2 wt% hemicellulose was converted with significant degradation of cellulose and lignin (18.4 wt% and 28.8 wt%). While 1 g AlCl<sub>3</sub> was used in 100 mL H<sub>2</sub>O, 72.6 wt% hemicellulose was extracted from *pubescens*, while significant conversion of cellulose and lignin was avoided.

The GPC results were shown in Table S8. In FL obtained at 120 °C for 4 h with HCl as catalyst, M<sub>w</sub> was about 1120-1160 g/ mol, which was much higher than that of FL with AlCl<sub>3</sub> as catalyst. When the FL obtained at 120 °C for 4 h with HCl was heated at 160 °C for 4 h in the HCl-SiO<sub>2</sub>-FL/THF system, M<sub>w</sub> was about 360-456 g/ mol, which were near to the weight of two or three molecules of xylose.

---

The result suggested oligomers was also existed with HCl as catalyst, while the oligomers in FL were almost converted completely with AlCl<sub>3</sub> as catalyst.

The influence of HCl and AlCl<sub>3</sub> catalysts on the product distribution were shown in Table S9. The selectivity to value-added chemicals (such as furfural and levulinic acid) and the selectivity to total monomers were low with a lower concentration of HCl in the first-step reaction. The results matched well with the low conversion of *pubescens*. Although 53.7% formic acid was obtained in the second-step reaction, the selectivity to total monomers was still low. When a higher concentration of HCl was used, the main product in FL was xylose (20.3%) in the first-step reaction which was similar to the result of AlCl<sub>3</sub>-catalyzed. However, when the FL was used for the second-step reaction in HCl-SiO<sub>2</sub>-FL/THF system, 10.3% formic acid was obtained and the selectivity to other liquid products was low. The selectivity to total monomers was only 15.8%. The results suggested that some oligomers still existed which was confirmed by the results of GPC.

In conclusion, the results suggested that the selective dissolution of hemicellulose with HCl was not better than AlCl<sub>3</sub>, while AlCl<sub>3</sub> was better for the degradation of oligomers compared with HCl. Therefore, Lewis acid played an important role in the selective dissolution of hemicellulose and conversion of dissolved hemicellulose into value-added monomers. The effect of the Brønsted acid obtained by the hydrolyzation of AlCl<sub>3</sub> in aqueous systems was little.

## 10. References (S1-S5)

- S1. Y. Yang, C. W. Hu and M. M. Abu-Omar, *ChemSusChem.*, 2012, **5**, 405.  
S2. Y. Yang, C. W. Hu and M. M. Abu-Omar, *Green Chem.*, 2012, **14**, 509.  
S3. V. Choudhary, S. I. Sandler, D. G. Vlachos, *ACS Catal.*, 2012, **2**, 2022.  
S4. L. C. Peng, L. Lu, J. H. Zhang, J. P. Zhuang, B. X. Zhang and Y. Gong. *Molecules*, 2010, **15**, 5258.  
S5. S. R. Kamireddy, J. B. Li, M. Tucker, J. Degenstein and Y. Ji, *Ind. Eng. Chem. Res.*, 2013, **52**, 1775.
